# Supplementary material for: Novel ternary fluorinated electrolyte's enhanced interfacial kinetics enables ultra-low temperature performance of lithium-ion batteries
Source: Royal Society of Chemistry journal article supplement (doi:10.1039/d3se00241a), 2023-01-01
Supplement: d3se00241a1.pdf [file d3se00241a1.pdf]

## Supplementary Information

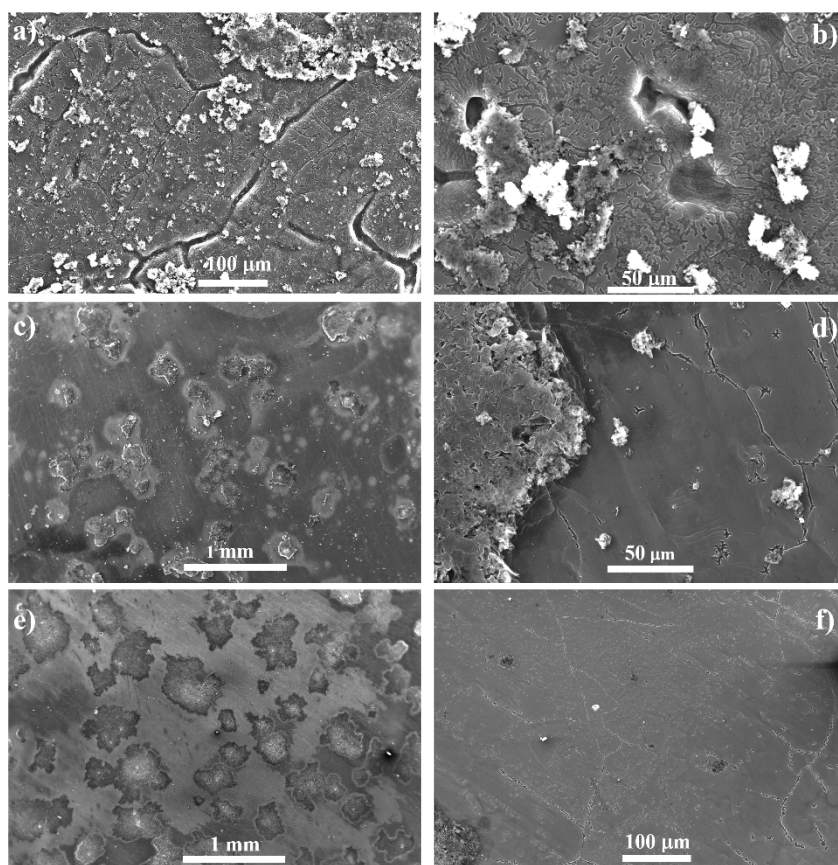

**Figure S1:** SEM images of the Li anode from disassembled Li||LFP cells after they have finished cycling at their lowest temperature (a-b) COM at 200x and 500x, (c-d) T-FFN at 30x and 500x, (e-f) F-FFN at 30x and 200x

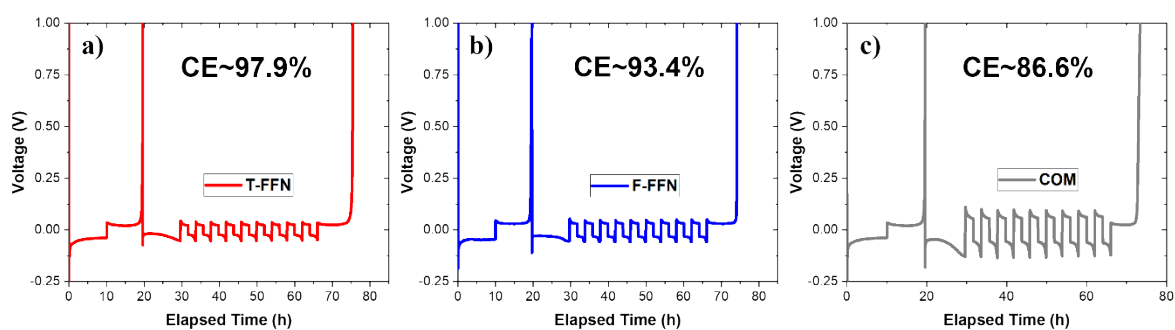

**Figure S2:** Li metal columbic efficiency of Li|Cu cells at RT of: (a) T-FFN, (b) F-FFN, (c) COM

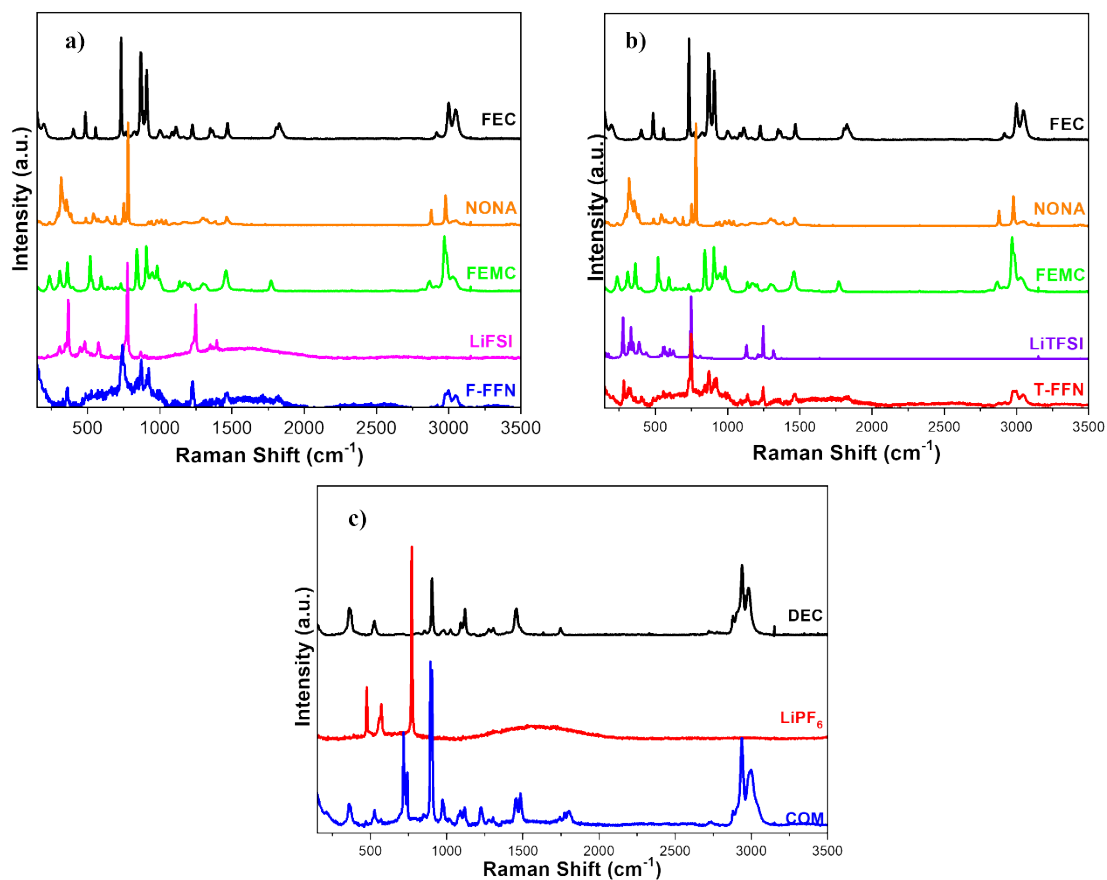

**Figure S3:** Full Raman spectra of: (a) T-FFN, (b) F-FFN, (c) COM

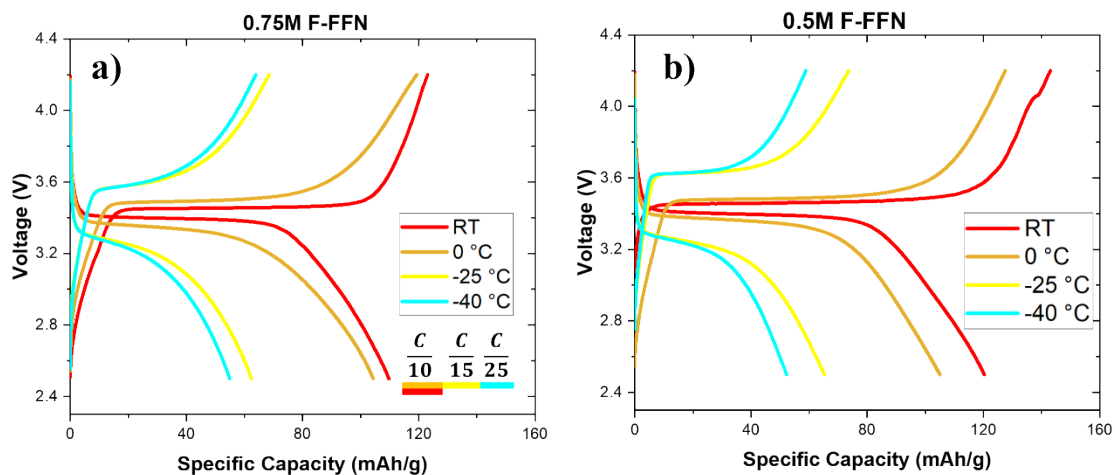

**Figure S4:** Temperature cycling studies performed at different temperatures of two different molarities F-FFN: (a) 0.75M F-FFN, (b) 0.5M F-FFN ,

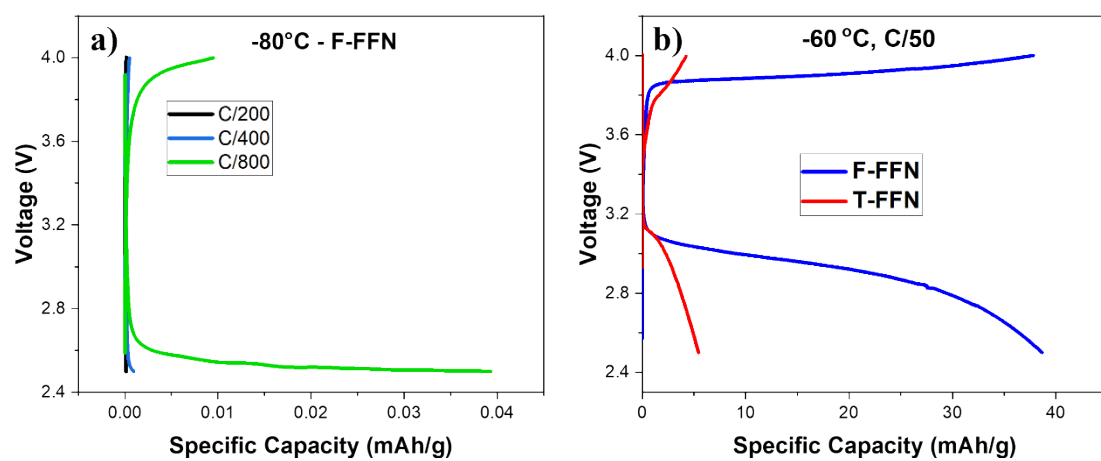

**Figure S5:** Single charge/discharge cycle at ultra-low temperature for F-FFN and T-FFN: **(a)** -80 °C, **(b)** -60 °C
